# Supplementary material for: Structure and energetics of hydrogen bonding networks in dilute HOD/H2O solutions confined in silica nanopores
Source: Royal Society of Chemistry journal article supplement (doi:10.1039/d3en00291h), 2023-01-01
Supplement: d3en00291h1.pdf [file d3en00291h1.pdf]

## Supporting Information

### Structure and energetics of hydrogen bonding networks in dilute HOD/H<sub>2</sub>O solutions confined in silica nanopores

Anastasia G. Ilgen\*<sup>1</sup>, Hasini S. Senanayake<sup>2</sup>, Ward H. Thompson<sup>2</sup>, and Jeffery A. Greathouse<sup>3</sup>

<sup>1</sup> Geochemistry Department, Sandia National Laboratories, Albuquerque, New Mexico 87185,  
USA

<sup>2</sup> Department of Chemistry, University of Kansas, Lawrence, Kansas 66045, USA

<sup>3</sup> Nuclear Waste Disposal Research & Analysis Department, Sandia National Laboratories,  
Albuquerque, New Mexico 87185, USA

\* Corresponding author: [agilgen@sandia.gov](mailto:agilgen@sandia.gov)

## S1. Raman spectroscopy of bulk and nanoconfined HOD/H<sub>2</sub>O solutions

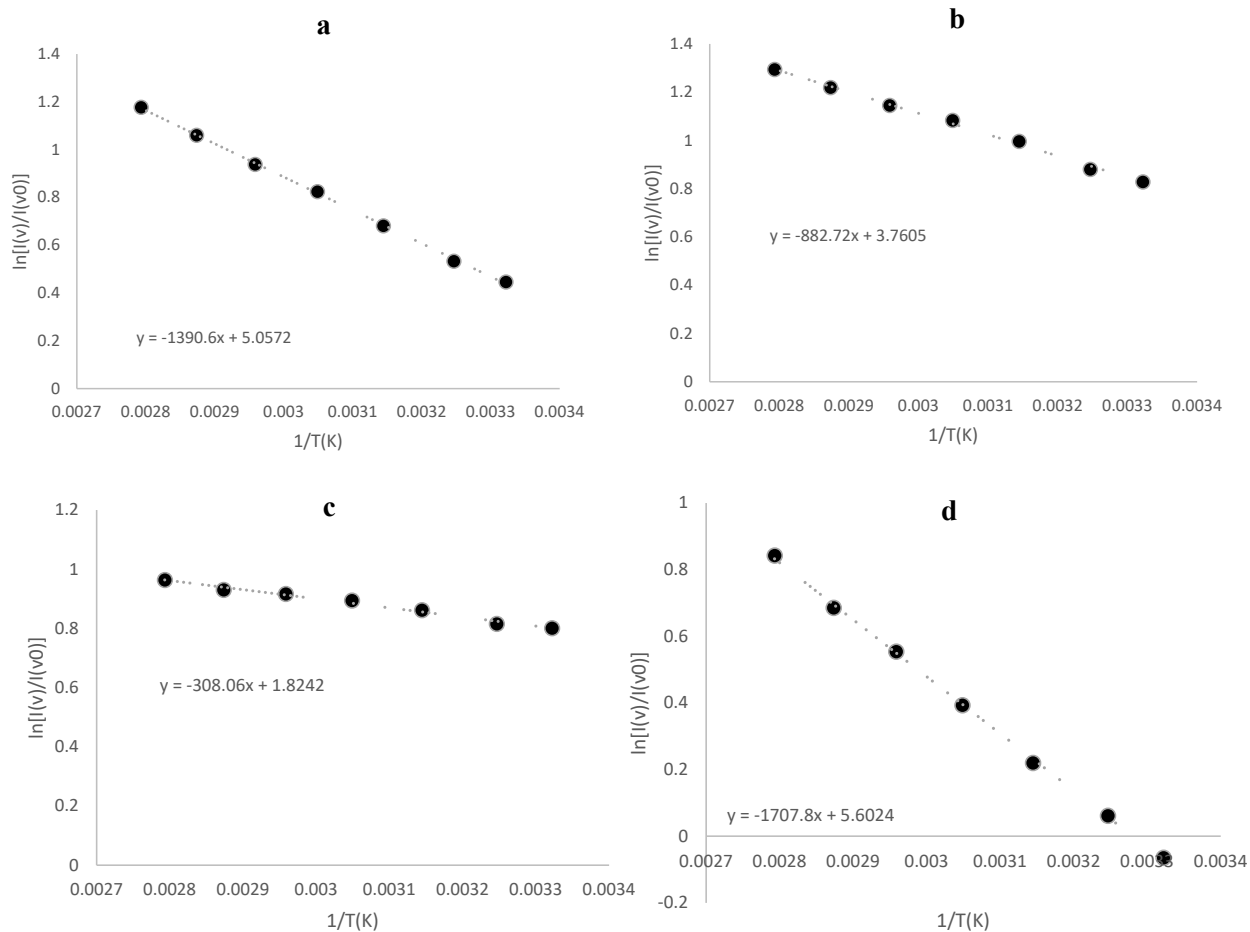

**Figure S1.** linear plots for  $\ln(Iv/Iv_0)$  vs  $1/T$  used to construct the effective internal energy plots. (a) for Raman shift 2602 cm<sup>-1</sup>; (b) for Raman shift 2551 cm<sup>-1</sup>; (c) for Raman shift 2500 cm<sup>-1</sup>; (d) for Raman shift 2650 cm<sup>-1</sup>.

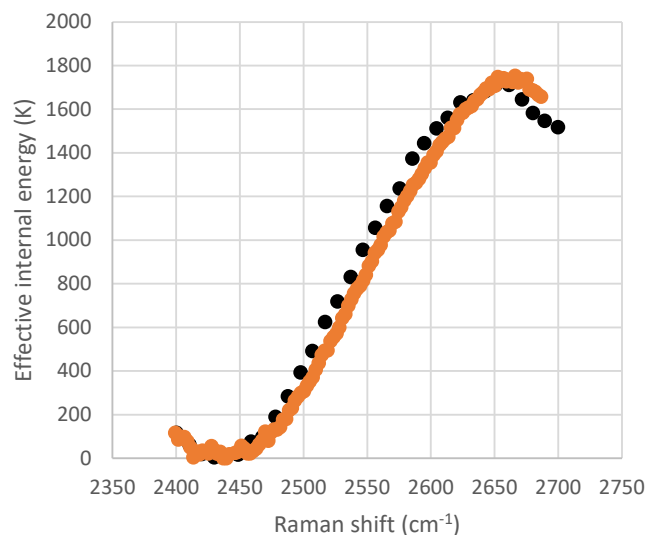

**Figure S2.** Comparison of the published<sup>1</sup> data on bulk HOD/H<sub>2</sub>O solutions with our new data on frequency-dependent internal OD energies. We are in excellent agreement with published work. The effective internal energy of an OD bond as a function of its vibrational frequency (in Kelvin) for dilute HOD/H<sub>2</sub>O solutions. Black data points is data from Hare and Sorenson<sup>1</sup>; orange data points that are closely-spaced is the data collected in this study.

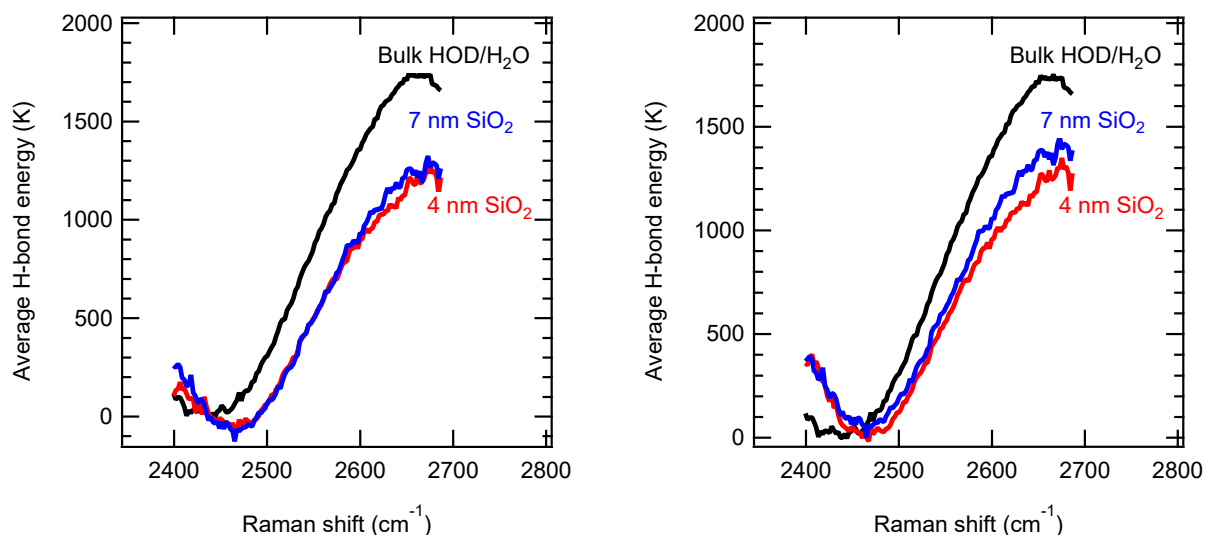

**Figure S3.** The effective internal energy of an OD bond as a function of its vibrational frequency (in Kelvin) for dilute HOD/H<sub>2</sub>O solutions. (Left) Intensities normalized by the Intensity at  $\nu_0$  at 2440 cm<sup>-1</sup>; (Right) Intensities normalized by the Intensity at  $\nu_0$  at 2465 cm<sup>-1</sup>. The Raman shift value of  $\sim 25$  cm<sup>-1</sup> towards higher frequency remain consistent between the two reference states.

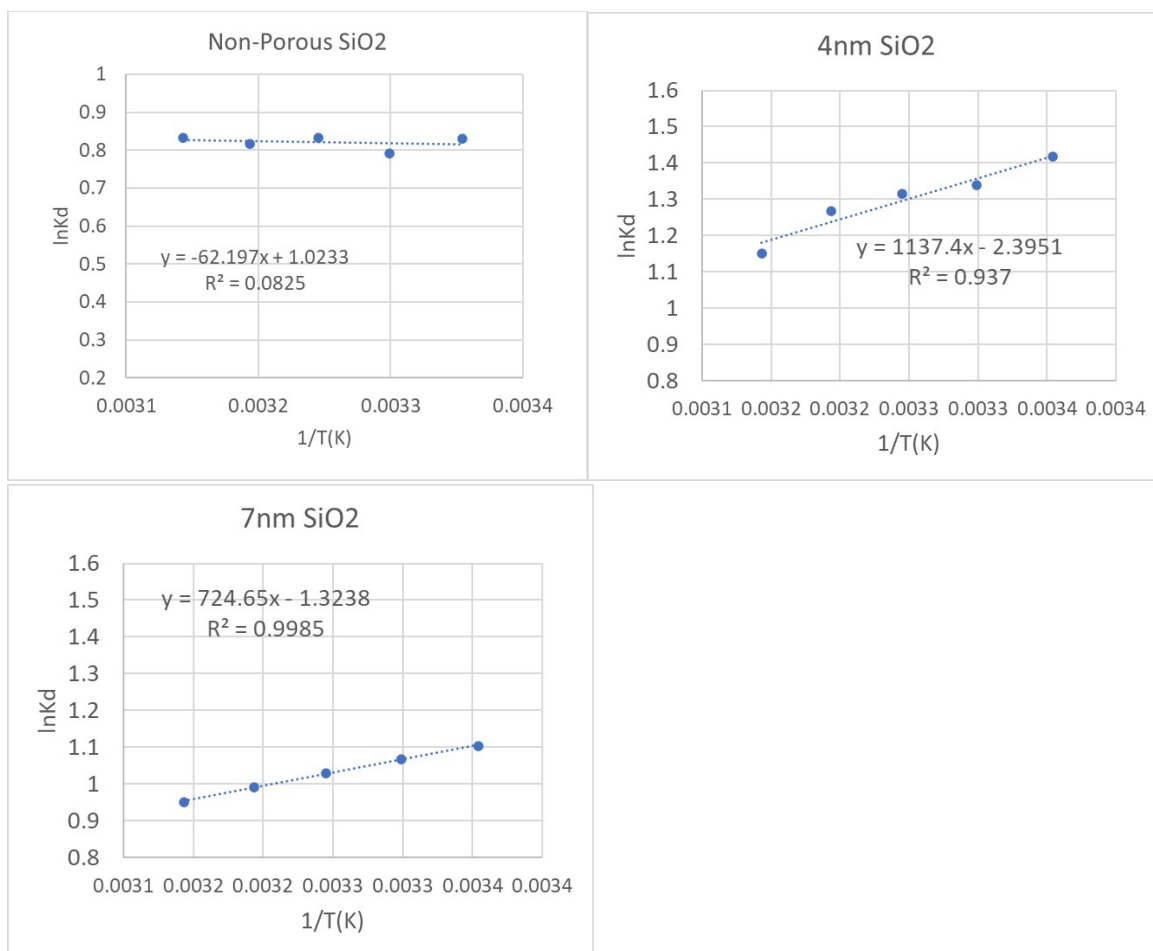

**Figure S4.** The lnKd vs.1/T plot for non-porous SiO2.

## S2. Classical Molecular Dynamics Simulations

The proposed silica-DDEC force field charges and Lennard-Jones parameters. (<sup>a</sup> In interactions with other silica atoms, <sup>b</sup> In interactions with water molecules)

|                    | Atom type            | q(e)   | $\sigma(\text{\AA})$ | $\epsilon(\text{kcal/mol})$ |
|--------------------|----------------------|--------|----------------------|-----------------------------|
| Framework sites    | Si <sup>a</sup>      | 1.86   | 2.7                  | 0.0001                      |
|                    | Si <sup>b</sup>      | 1.86   | 3.0                  | 0.01                        |
|                    | O <sup>a</sup>       | -0.93  | 2.7                  | 0.4668                      |
|                    | O <sup>b</sup>       | -0.93  | 3.3                  | 0.1852                      |
| Silanols           | O(H)                 | -0.898 | 3.3                  | 0.1852                      |
|                    | H(O)                 | 0.433  | 0.0                  | 0.0                         |
| Deprotonated Sites | Si(O <sup>-</sup> )  | 1.655  | 2.7                  | 0.0001                      |
|                    | O <sup>-</sup>       | -1.08  | 3.3                  | 0.1852                      |
|                    | O(SiO <sup>-</sup> ) | -0.99  | 2.7                  | 0.4668                      |

## Reference

- 1 Hare, D. & Sorensen, C. Raman spectroscopic study of dilute HOD in liquid H<sub>2</sub>O in the temperature range– 31.5 to 160 C. *The Journal of chemical physics* **93**, 6954-6961 (1990).
